# Supplementary material
Source: publisher figshare collection journal article supplement (https://frontiersin.figshare.com/ndownloader/files/34461338)
Supplement: Supplementary file 1 [file 34461338]

Supplementary Material

Communicating seismic risk information: The effect of risk comparisons on risk perception sensitivity

# S1. Individual Subjective Numeracy

We assessed the extent to which subjective ability to deal with numerical information, such as percentages and fractions, influenced perceived seismic risk and how this interacted with the provision of risk comparisons. The mean subjective numeracy score for all participants was 5.12 (*SD* = 1.27), with a minimum of 1 and a maximum of 7. Participants' numeracy did not differ between the six experimental conditions (all *p*'s> .16), confirming that numeracy was evenly distributed across experimental groups. Higher numeracy was significantly correlated with being male (*r* = .224; *p* < .001), highly educated (*r* = .180; *p* < .001), higher in socioeconomic status (*r* = .179; *p* < .001), and higher in seismic knowledge (*r* = .215; *p* < .001). Higher numeracy was also significantly correlated with checking whether the participants' building was earthquake-proof (*r* = .165; *p* < .001) and looking for information on institutional websites (*r* = .09; *p* = .033).

The effect of numeracy as a potential moderating variable on the relationship between the experimental manipulation and perceived risk was investigated by adding numeracy as a covariate in the 3 x 2 ANOVA. The analysis revealed a non significant main effect of numeracy on perceived risk, *F*(1, 555) = 0.12, *p* = .731, , ηp2 = .000, while all other effects remained substantially unchanged after controlling for numeracy. In conclusion, we found no evidence that numeracy directly impacts perceived risk and that the numerical skills of participants influenced the effect of providing risk comparisons on perceived risk sensitivity.

# S2. Earthquake Knowledge

We assessed the extent to which the participants' reported knowledge of seismic risk was associated with the other variables examined in the study. The mean self-reported knowledge for all participants was 3.40 (*SD* = 1.91) with a minimum of 0 and a maximum of 10. Participants' knowledge did not differ between the six experimental conditions (all *p*'s> .23), confirming that knowledge was evenly distributed across experimental groups. Higher knowledge was significantly correlated with belonging to a higher socioeconomic status (*r* = .103; *p* = .016) and with having a higher numerical skill (*r* = .215; *p* < .001). Moreover, higher knowledge was significantly correlated with intending to get an emergency kit ready (*r* = .096; *p* = .023), aiming at looking for information on institutional websites (*r* = .154; *p* < .001), intending to check whether the city has an emergency plan and what are its directions (*r* = .100; *p* = .018), and intending to check whether the building where respondents lived was earthquake-proof (*r* = .124; *p* = .003).

The effect of knowledge as a potential moderating variable on the relationship between the experimental manipulation and perceived risk was investigated by adding it as a covariate in the 3 x 2 ANOVA. The analysis revealed a significant main effect of knowledge on perceived risk, *F*(1, 555) = 11.01, *p* < .001, ηp2 = .001, meaning that highly knowledgeable individuals perceived higher seismic risk than less knowledgeable individuals. Controlling for knowledgeableness, however, did not influence our main results. Indeed, the probability level still yielded a significant main effect on perceived risk, *F*(2, 555) = 27.08, *p* < 0.001, ηp2 = .089 and probability level still significantly interacted with risk comparisons, *F*(2,555) = 3.09, *p* = .046, ηp2 = .011, although to a slightly less extent.

In conclusion, we found evidence that higher knowledge increases perceived risk, but we found no evidence that individual knowledge influences the effect of providing comparison risks on seismic risk sensitivity.

# S3. Communicative Intention

Most respondents reported that the communicative intention was neither to minimize nor to maximize the risk but just trying to inform (83%). Few said that the intention was to minimize the risk, trying to convince them that the risk was smaller than they thought (12%), and even less reported that the intention was to maximize the risk, trying to convince them that the risk was greater than they thought (5%). As commented earlier, higher perceived risk was significantly correlated with a firmer belief in the intention to maximize the risk, showing that participants who worry more about seismic risk tend to give a communicative intention to the message that is coherent with their worries. Neither the level of probability nor the type of risk comparisons significantly affected this judgment (all *p*'s>.87).
